# Supplementary material for: Structural and kinetic insights into flavin-containing monooxygenase and calponin-homology domains in human MICAL3
Source: PubMed Central journal article supplement (PMC6949599; doi:10.1107/s2052252519015409), 2020-01-01
Supplement: m-07-00090-sup1.pdf [file m-07-00090-sup1.pdf]

# IUCrJ

**Volume 7 (2020)**

**Supporting information for article:**

**Structural and kinetic insights into flavin-containing monooxygenase and calponin-homology domains in human MICAL3**

**Junsoo Kim, Haemin Lee, Yeon Jin Roh, Han-ul Kim, Donghyuk Shin, Sorah Kim, Jonghyeon Son, Aro Lee, Minseo Kim, Junga Park, Seong Yun Hwang, Kyunghwan Kim, Yong Kwon Lee, Hyun Suk Jung, Kwang Yeon Hwang and Byung Cheon Lee**

**Table S1** Oligonucleotide primers used for amplification of DNA fragments of MICAL forms.

Restriction enzyme sites are indicated as capitalized (BamH1) and bold (Xho1). Each MICAL form was amplified by primers as follows: *hMICAL1<sub>FMOCH</sub>* (1, 2), *hMICAL1<sub>FMO</sub>* (1, 3), *hMICAL3<sub>FMOCH</sub>* (4, 5) and *hMICAL3<sub>FMO</sub>* (4, 6).

| Oligonucleotide   | Sequence (5'→3')                              |
|-------------------|-----------------------------------------------|
| 1 MICAL1 Fw       | aaGGATCCatggcttcacctacctccaccaa               |
| 2 MICAL1 FMOCH Rv | <b>aaactcgagct</b> agtagggccatgctcttgaaggca   |
| 3 MICAL1 FMO Rv   | <b>aaactcgagct</b> actccttgctagcacatcatacaggt |
| 4 MICAL3 Fw       | aaGGATCCatggaggagaggaagcatgagacca             |
| 5 MICAL3 FMOCH Rv | <b>aaactcgagct</b> atcttctcctctgtggccccga     |
| 6 MICAL3 FMO Rv   | <b>aaactcgagct</b> atcttctcctctgtggccccga     |

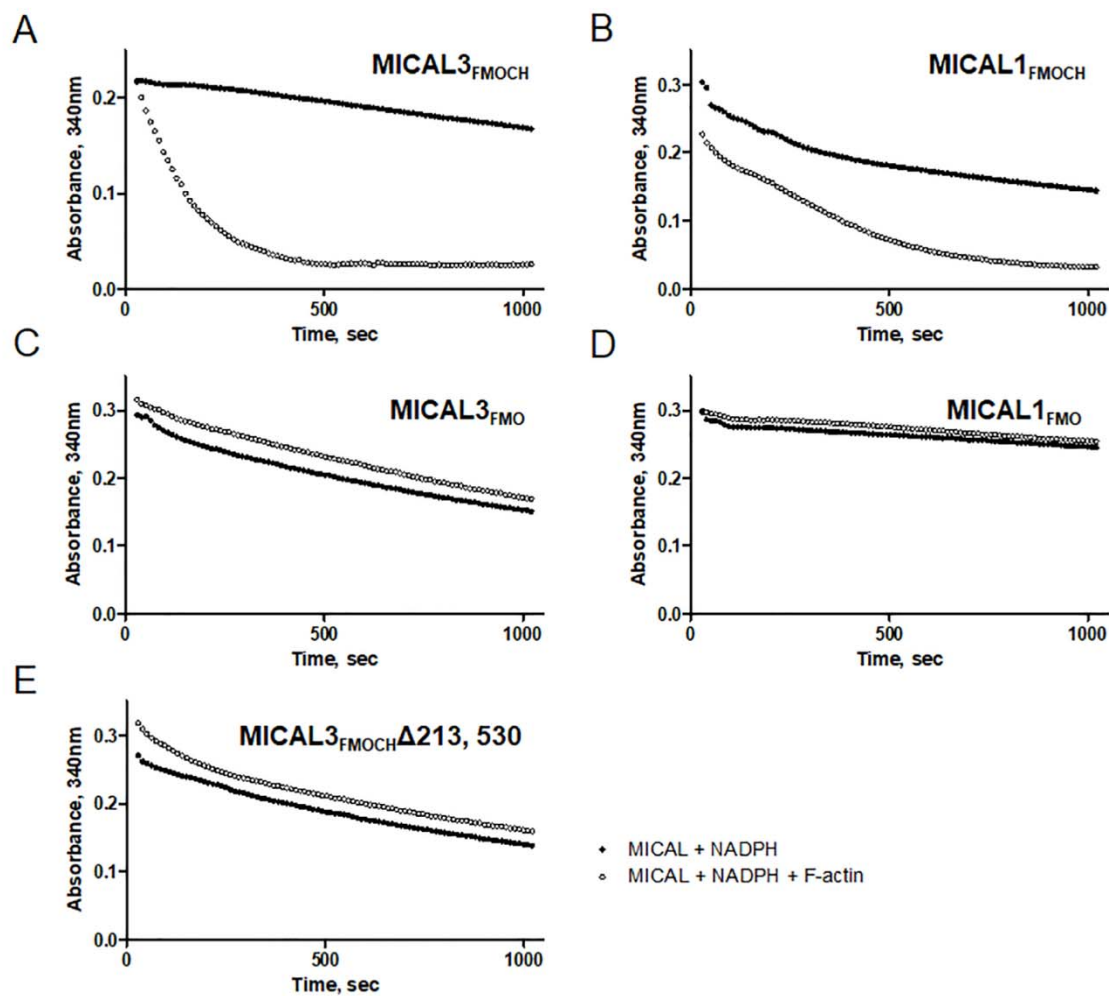

**Figure S1** Time-course of NADPH oxidation catalyzed by MICAL forms. The reaction of NADPH oxidation catalyzed by each MICAL form (600nM) was monitored at 340 nm for 15 min. The initial concentration of NADPH was 200  $\mu$ M and the reaction was progressed with or without F-actin (8  $\mu$ M).

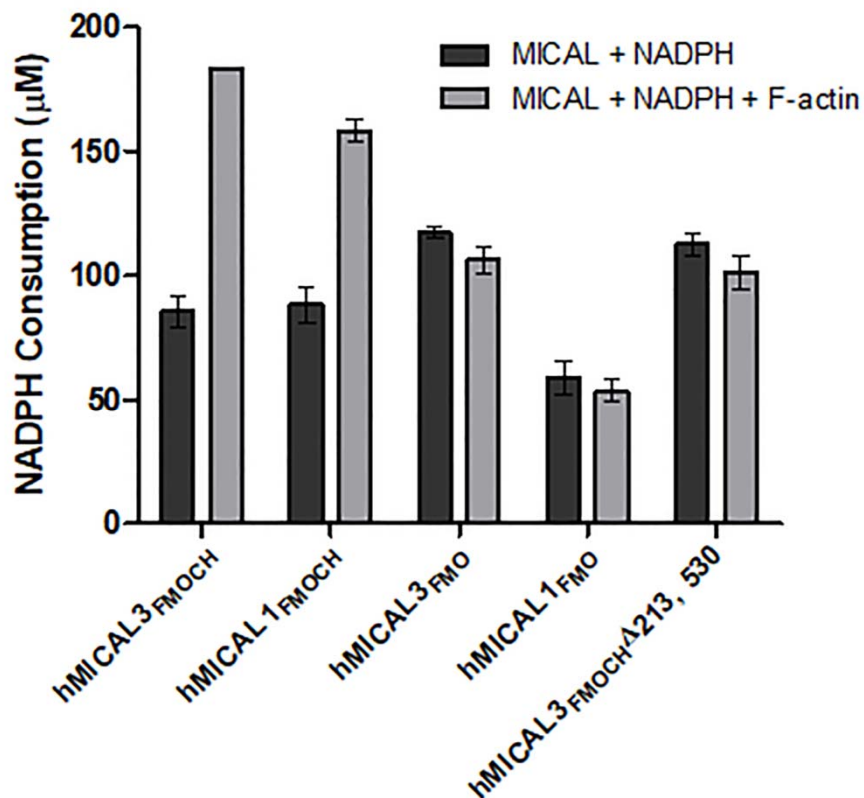

**Figure S2** Total NADPH consumption in 15 min. Each MICAL form (600 nM) was incubated with 200  $\mu$ M of NADPH in the absence (black bar) or in the presence (gray bar) of F-actin (8  $\mu$ M). NADPH consumption was calculated by subtracting the final NADPH concentration from the NADPH standard.
